# Supplementary material
Source: PubMed Central journal article supplement (PMC8245425)
Supplement: 41423_2020_363_MOESM1_ESM.pdf [file 41423_2020_363_MOESM1_ESM.pdf]

# Three paralogous clusters of miR-17~92 family microRNAs restrain IL-12-mediated immune defense

Xiang Zhang<sup>1,2,3</sup>, Sinead M. Smith<sup>4</sup>, Xi Wang<sup>5</sup>, Baohong Zhao<sup>6,7</sup>, Li Wu<sup>1,2,3</sup>, and Xiaoyu Hu<sup>1,2,3,\*</sup>

## Supplementary Figure 1

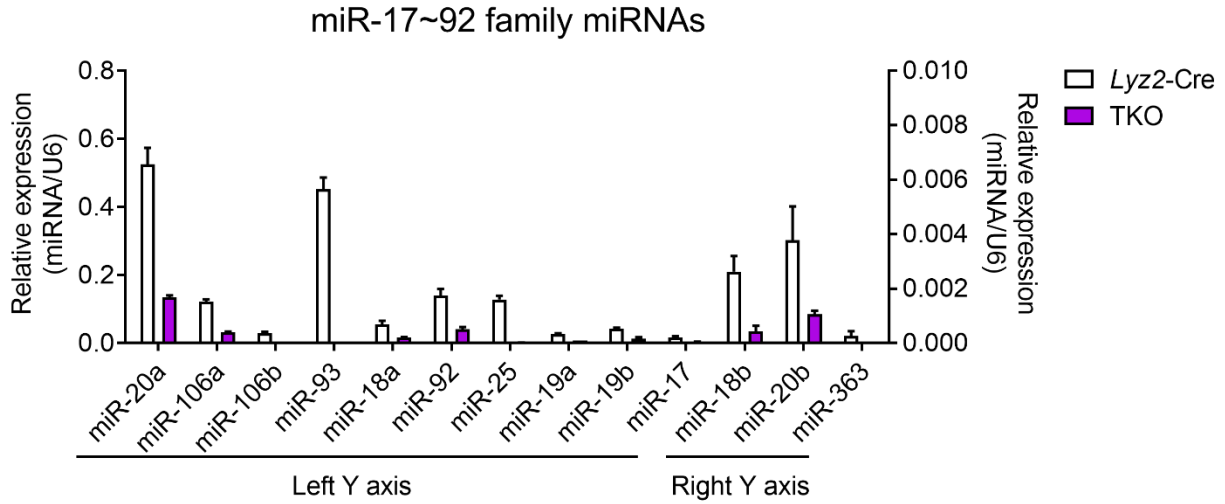

### Supplementary Figure 1

#### The miR-17~92 family miRNAs are efficiently deleted in TKO BMDMs.

qPCR analysis of various mature miRNAs (horizontal axes) in *Lyz2-Cre* and *miR-106a~363<sup>-/-</sup> miR-106b~25<sup>-/-</sup> miR-17~92<sup>fllox/fllox</sup> Lyz2-Cre* (TKO) BMDMs; results are presented as relative expression normalized to the control small RNA U6. Data are representative of two independent experiments. Data are presented as mean + SD.

## Supplementary Figure 2

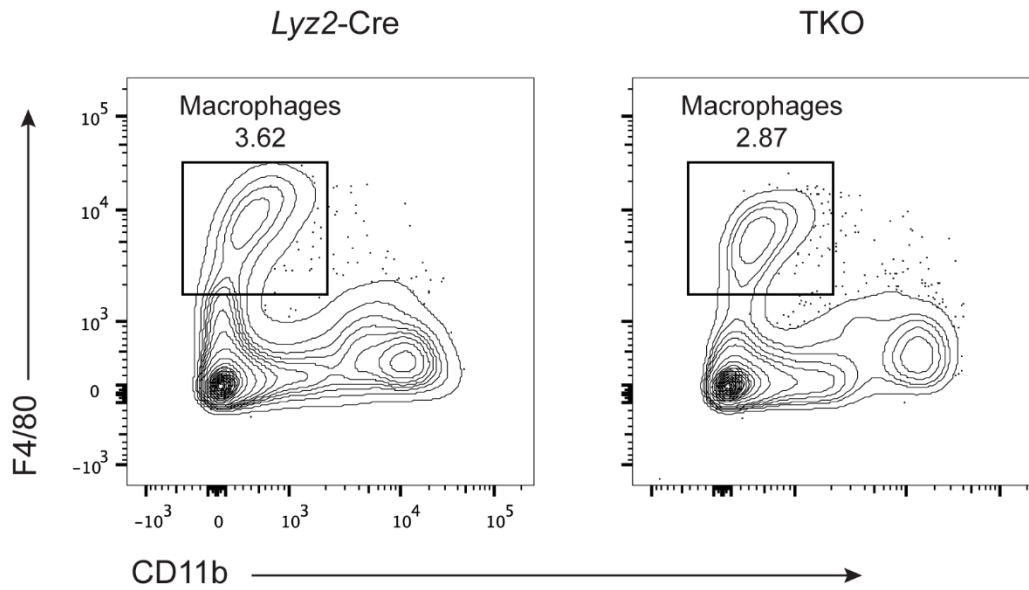

### Supplementary Figure 2

#### **The miR-17~92 family miRNA deficient mice exhibit normal macrophage populations.**

FACS analysis of macrophage populations in the spleen of *Lyz2-Cre* and TKO mice under homeostatic conditions. Results of one representative experiment out of two performed are shown.

### Supplementary Figure 3

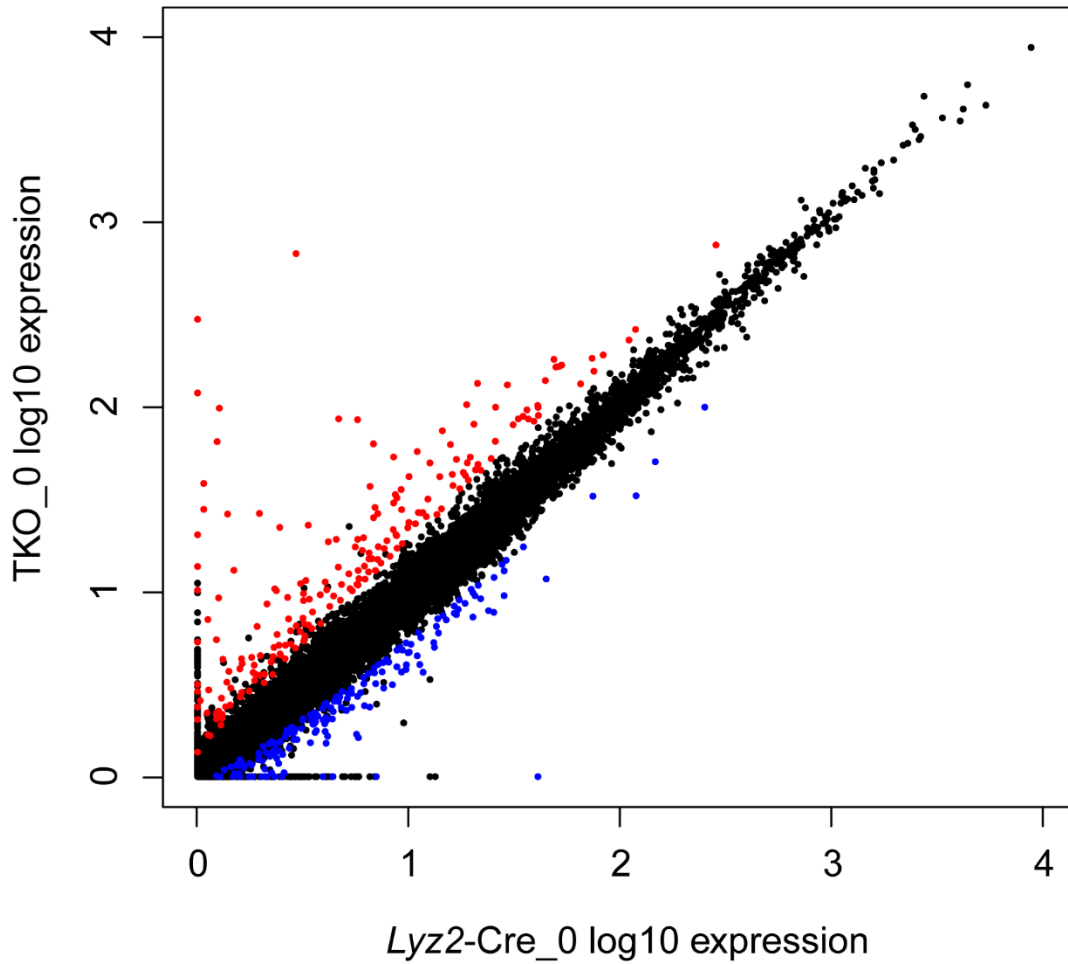

#### Supplementary Figure 3

**miR-17~92 family miRNAs do not regulate *Ill12a* and *Ill12b* expression under homeostatic condition in macrophages.**

RNA-seq analysis showing RNA expression in TKO BMDMs versus those in *Lyz2-Cre* cells without stimulation. RNAs up-regulated in TKO BMDMs were colored red, whereas RNAs down-regulated were colored blue.

## Supplementary Figure 4

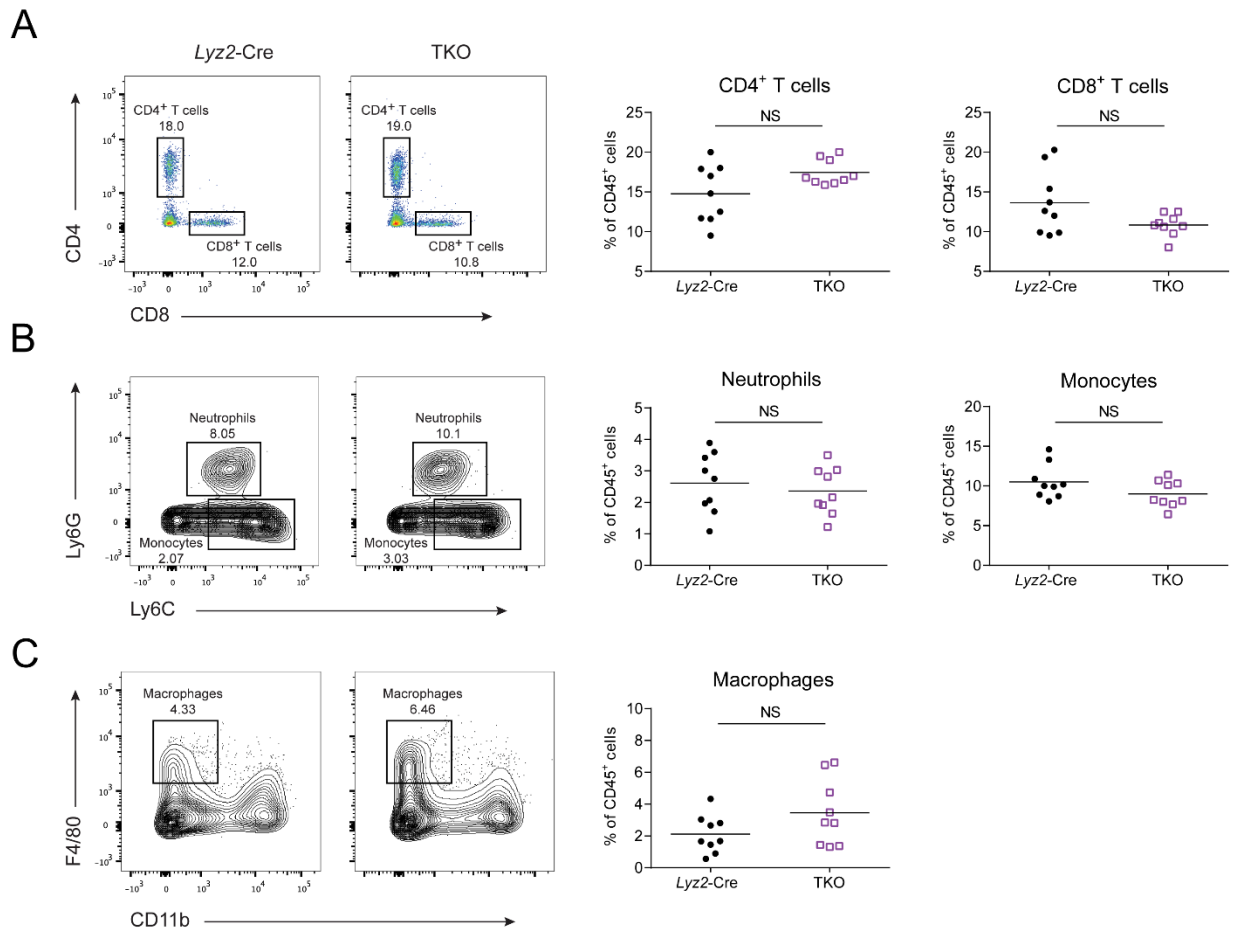

## Supplementary Figure 4

**miR-17~92 family miRNA deficiency does not alter cell populations in *Listeria monocytogenes* infected mice.**

FACS analysis of CD4<sup>+</sup> and CD8<sup>+</sup> T cells (A), monocytes and neutrophils (B), and macrophages (C) in the spleen of *Ly2z-Cre* and TKO mice infected with  $5 \times 10^4$  *L. monocytogenes* for 6 days.

FACS plots from one representative experiment is shown on the left panels and percentages of each cell population from 9 mice are quantified as mean values in the right panels. Data are pooled from two independent experiments (n = 9 mice per group).

Statistical significance was calculated using Unpaired Student's *t*-test (NS, not significant,  $P > 0.05$ ).

## Supplementary Figure 5

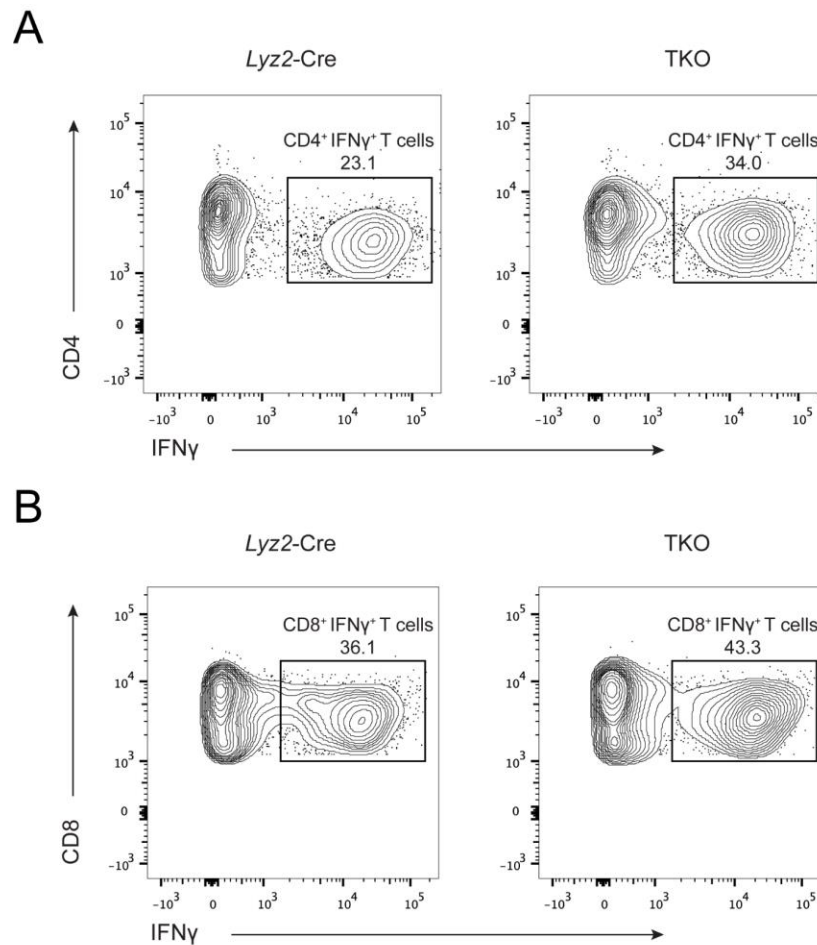

### Supplementary Figure 5

**miR-17~92 family miRNA deficiency promotes IFN $\gamma$  production in CD4<sup>+</sup> and CD8<sup>+</sup> T cells.**

FACS analysis of IFN $\gamma$  producing CD4<sup>+</sup> (A) and CD8<sup>+</sup> (B) T cells in the spleen of *Lyz2-Cre* and *TKO* mice infected with  $5 \times 10^4$  *L. monocytogenes* for 8 days. Results of one representative experiment out of two performed are shown.

### Supplementary Figure 6

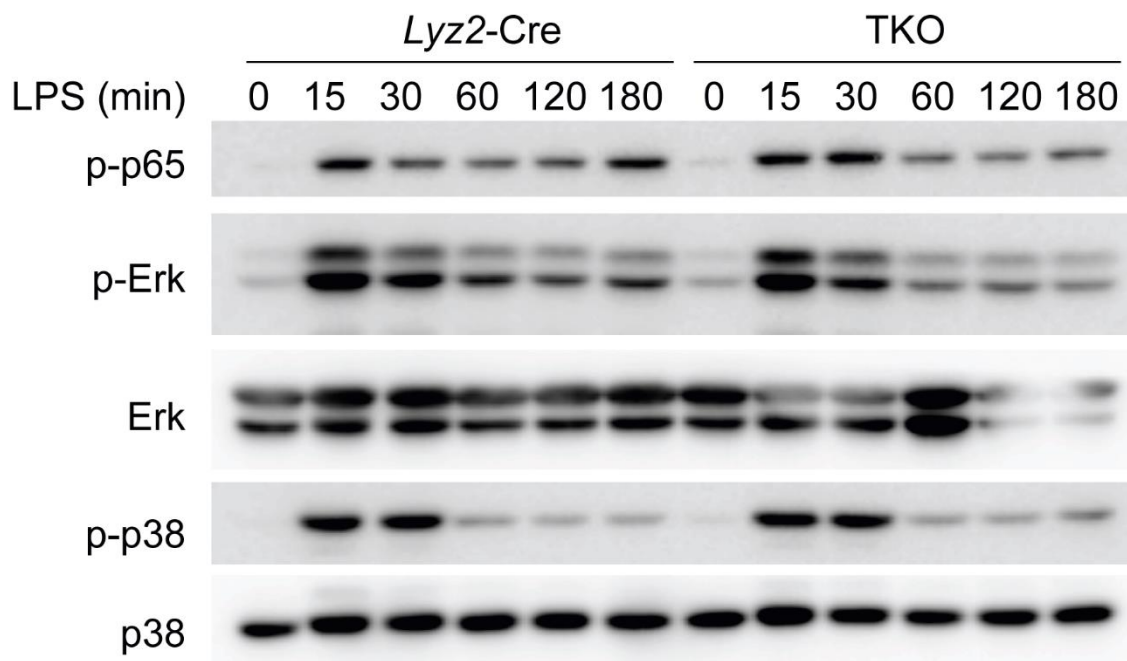

#### Supplementary Figure 6

#### **miR-17~92 family miRNA deficiency does not alter activation of canonical NF- $\kappa$ B and MAPK signaling pathways.**

Immunoblotting analysis of phosphorylated p65, phosphorylated and total Erk, phosphorylated and total p38 in whole-cell lysates of *Lyz2-Cre* and TKO BMDMs treated for the indicated periods with LPS. Data are representative of three independent experiments.

## Supplementary Figure 7

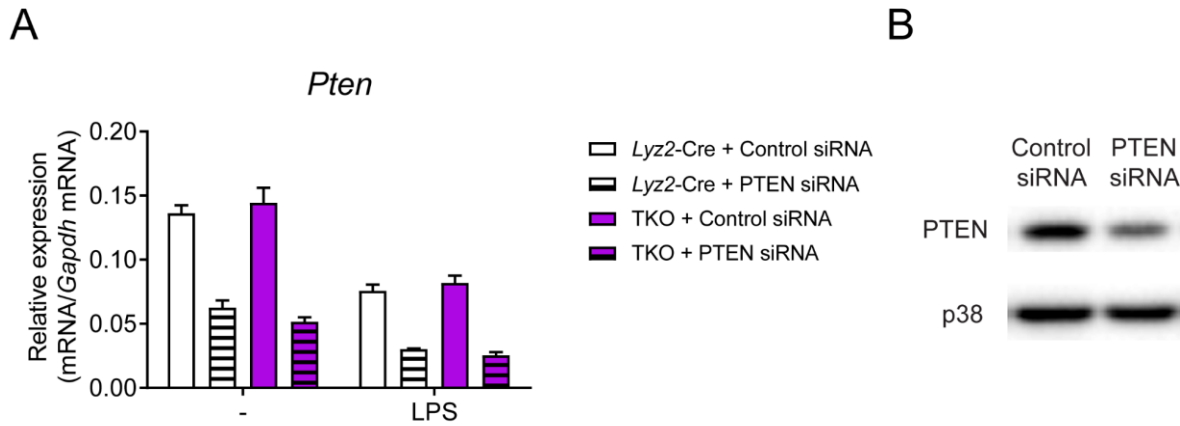

### Supplementary Figure 7

#### **PTEN expression is efficiently knocked down by RNA interference.**

(A) *Lyz2-Cre* and TKO BMDMs were transfected with control non-targeting or PTEN specific siRNA. 72 h post transfection, cells were stimulated with LPS for 3 h and *Pten* mRNA levels were assessed by qPCR. Results are presented as relative expression normalized to *Gapdh* mRNA.

(B) Immunoblotting analysis of PTEN and p38 (loading control) in whole-cell lysates of TKO BMDMs transfected with siRNAs and stimulated with LPS as in (A). Data are representative of three independent experiments.

Data are presented as mean + SD.



Supplementary Table 1. Primers used in this study.

| Gene                                | Forward Primer (5'>3')   | Reverse Primer (5'>3')     |
|-------------------------------------|--------------------------|----------------------------|
| Primer sequences for regular qPCR   |                          |                            |
| <i>Il12a</i>                        | ACGGGACCAAACCAGCACATT    | AAGGCACAGGGTCATCATCAAAGA   |
| <i>Il12b</i>                        | AGCACTCCCCATTCCTACTTCTCC | CACCCCTCCTCTGTCTCCTTCAT    |
| <i>Pten</i>                         | CATGACAGCCATCATCAAAGA    | TCTGCAGGAAATCCCATAGC       |
| <i>Gapdh</i>                        | ATCAAGAAGGTGGTGAAGCA     | AGACAACCTGGTCCTCAGTGT      |
| Primer sequences for small RNA qPCR |                          |                            |
| <i>miR-17</i>                       | CAAAGUGCUUACAGUGCAGGUAGU |                            |
| <i>miR-20a</i>                      | UAAAGUGCUUAUAGUGCAGGUAG  |                            |
| <i>miR-20b</i>                      | CAAAGUGCUCAUAGUGCAGGUA   |                            |
| <i>miR-106a</i>                     | CAAAGUGCUAACAGUGCAGGUA   |                            |
| <i>miR-106b</i>                     | UAAAGUGCUGACAGUGCAGAU    |                            |
| <i>miR-93</i>                       | CAAAGUGCUGUUCGUGCAGGUAG  |                            |
| <i>miR-18a</i>                      | UAAGGUGCAUCUAGUGCAGUA    |                            |
| <i>miR-18b</i>                      | UAAGGUGCAUCUAGUGCAGUUA   |                            |
| <i>miR-19a</i>                      | UGUGCAAAUCUAUGCAAAACUGA  |                            |
| <i>miR-19b</i>                      | UGUGCAAAUCCAUGCAAAACUGA  |                            |
| <i>miR-92</i>                       | UAUUGCACUUGUCCCGGCCUG    |                            |
| <i>miR-25</i>                       | CAUUGCACUUGUCUCGGUCUGA   |                            |
| <i>miR-363</i>                      | AAUUGCACGGUAUCCAUCUGUAA  |                            |
| <i>U6</i>                           | TGGCCCCTGCGCAAGGATG      |                            |
| Universal reverse primer            |                          | GCGAGCACAGAATTAATACGACTCAC |
